# Supplementary material for: Is Dynamic Total-body PET Imaging Feasible in the Clinical Daily Practice?
Source: Research Square preprint supplement (doi:10.21203/rs.3.rs-648137/v1), 2021-06-25
Supplement: Supplementary file 1 [file 23ae50a2f24da0c19606a5e1.docx]

## Supplementary material

**Is dynamic total-body PET imaging feasible in the clinical daily practice?**

Yumei Chen1, Lianghua Li1, Xiaofeng Yu1, Jingyi Wang2, Ying Wang2, Gang Huang3, Jianjun Liu1

*1Department of Nuclear Medicine, Ren Ji Hospital, School of Medicine, Shanghai Jiao Tong University, Shanghai, People's Republic of China,*

*2United Imaging Healthcare, Shanghai, People's Republic of China,*

*3Shanghai Key Laboratory of Molecular Imaging, Shanghai University of Medicine and Health Sciences, Shanghai, People's Republic of China,*

Corresponding author: Jianjun Liu, Department of Nuclear Medicine, Ren Ji Hospital, School of Medicine, Shanghai Jiao Tong University, 1630 Dongfang Rd, Shanghai, 200127, People's Republic of China*.* E-mail: nuclearj@163.com;

Gang Huang, E-mail: huang2802@163.com

Yumei Chen, Lianghua Li, Xiaofeng Yu contributed equally to this work


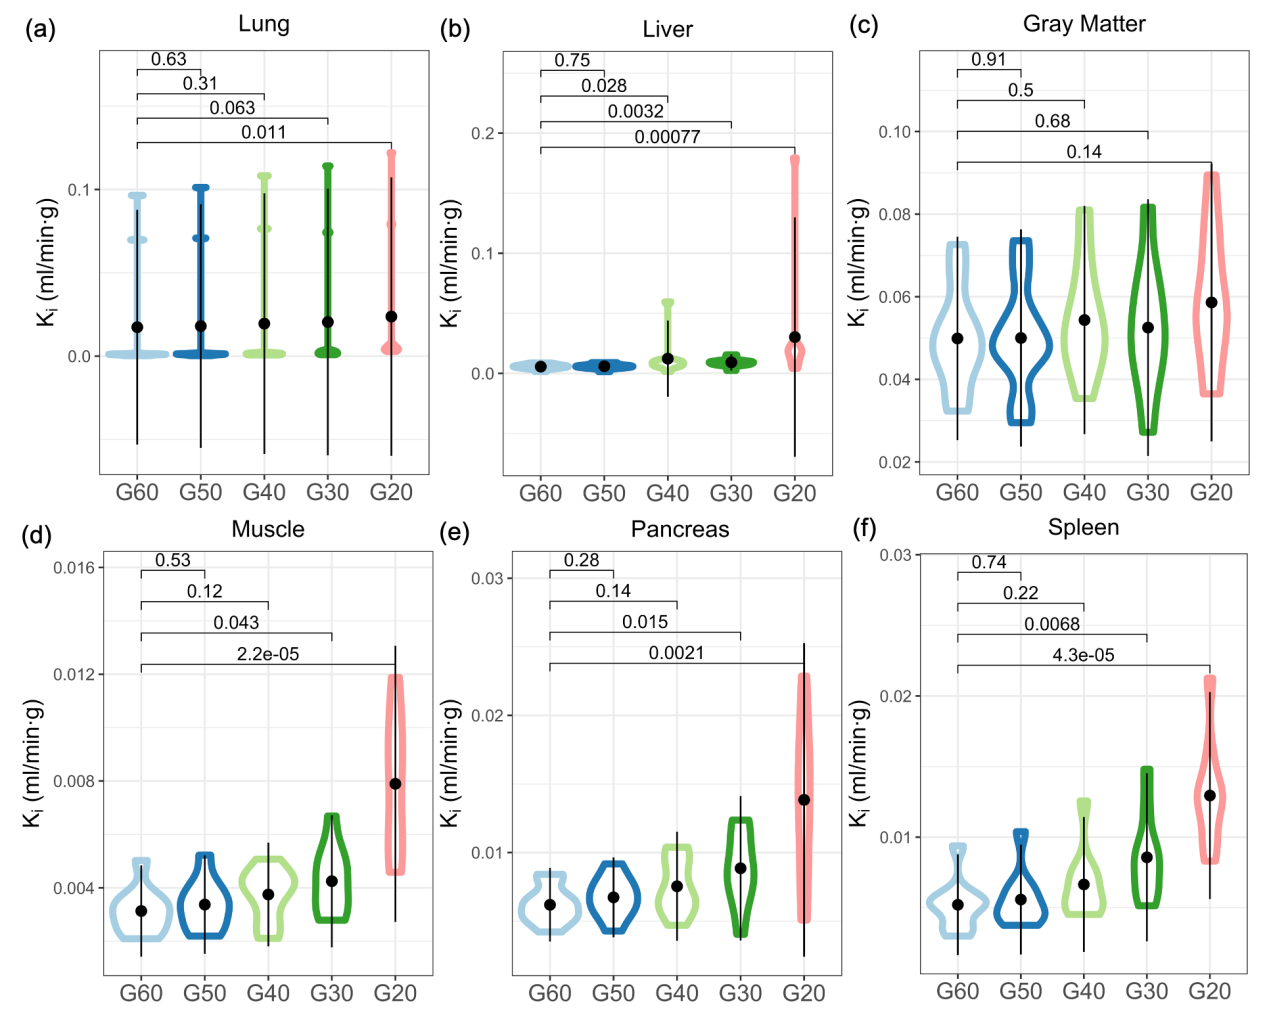


**Supplementary Fig. S1** The comparison of Ki for the organs/tissues from different acquisition time compared with the reference G60.


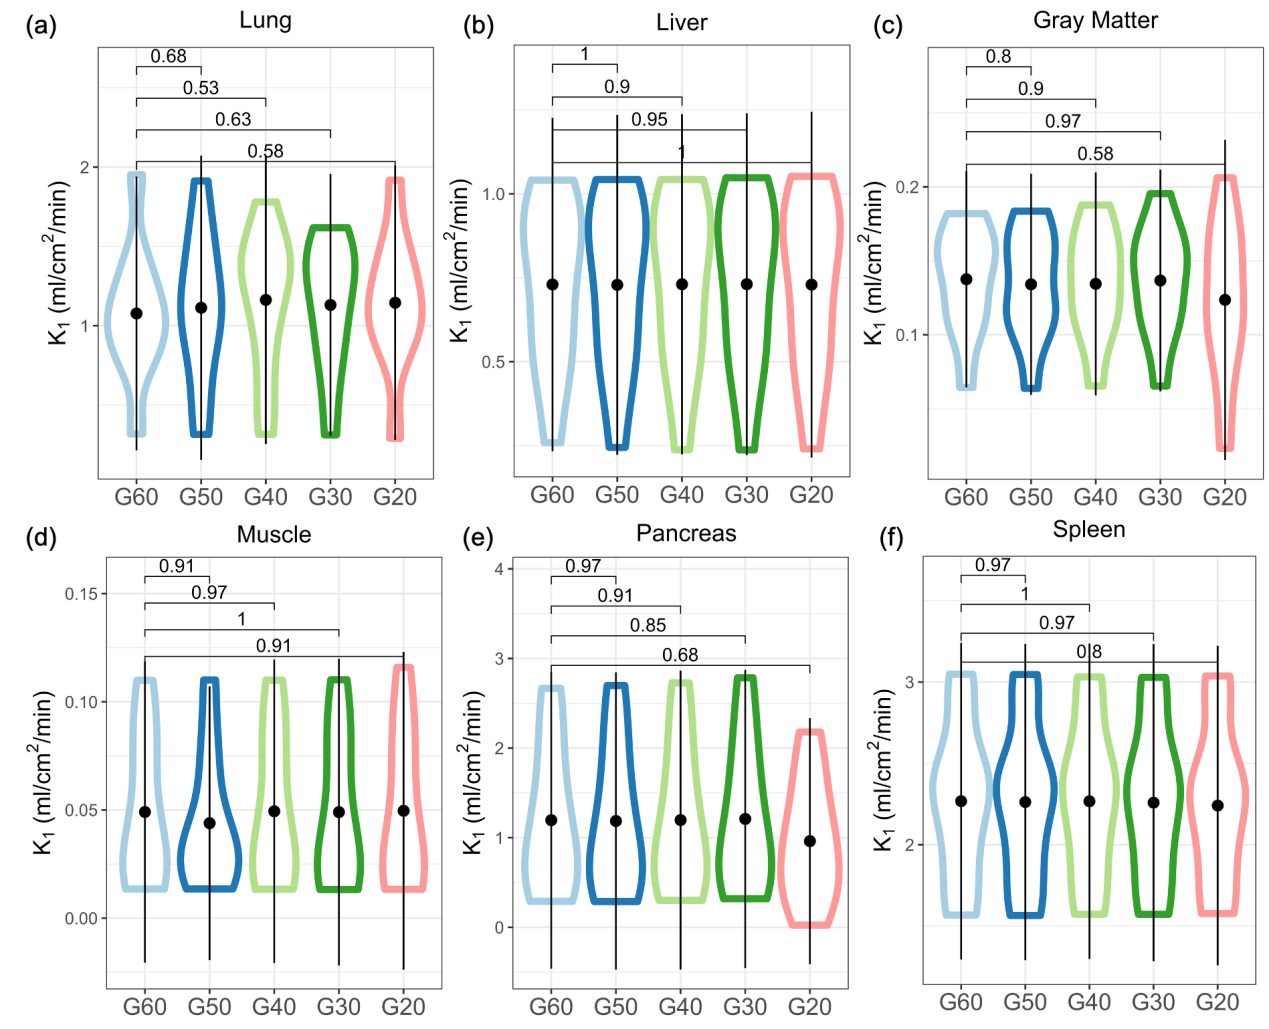


**Supplementary Fig. S2** The comparison of K1 for the organs/tissues from different acquisition time compared with the reference G60.


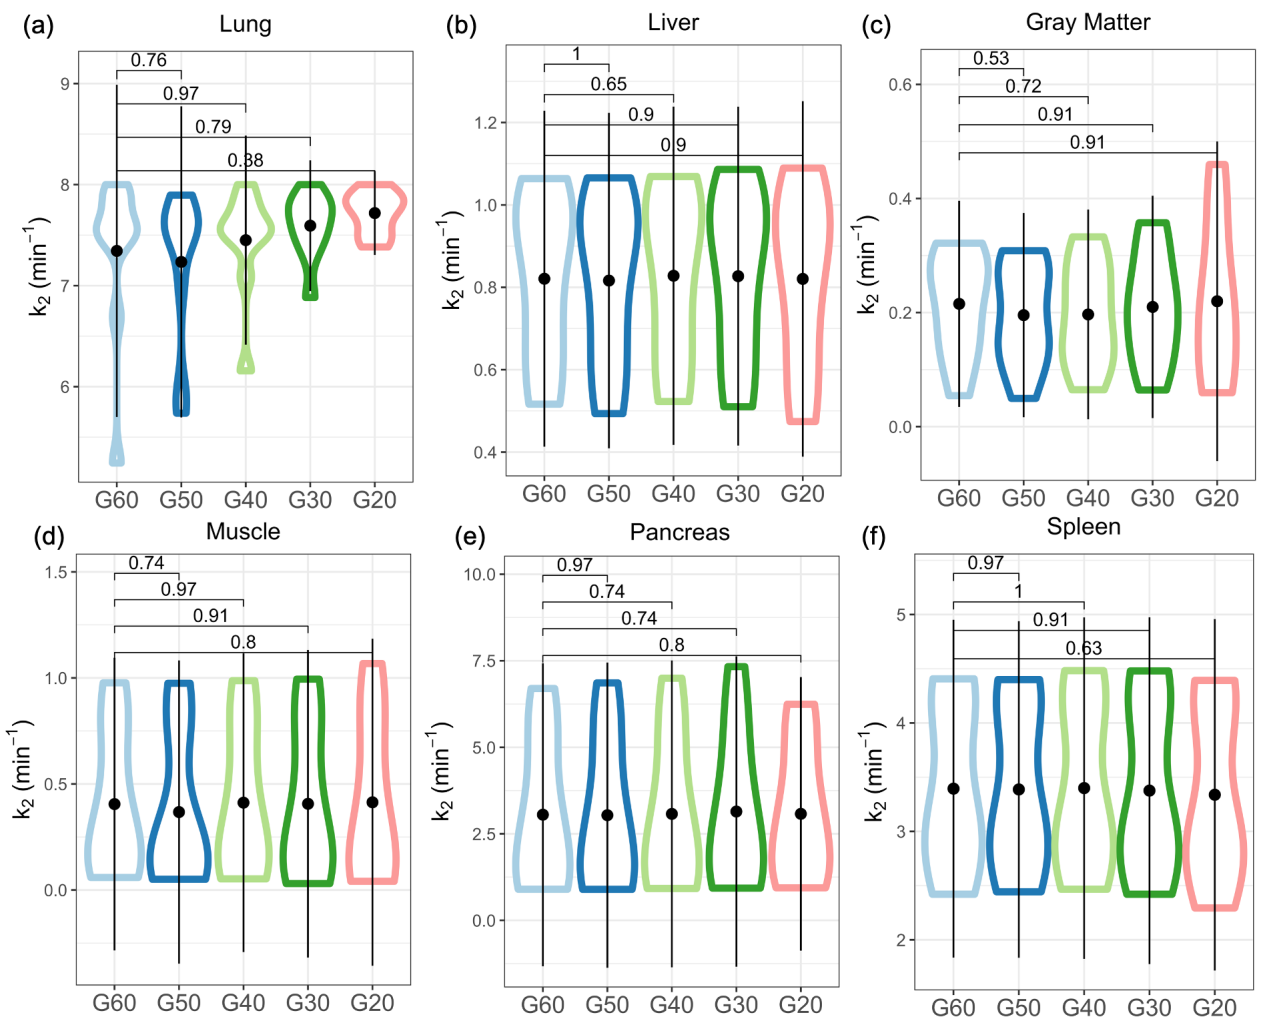


**Supplementary Fig. S3** The comparison of k2 for the organs/tissues from different acquisition time compared with the reference G60.


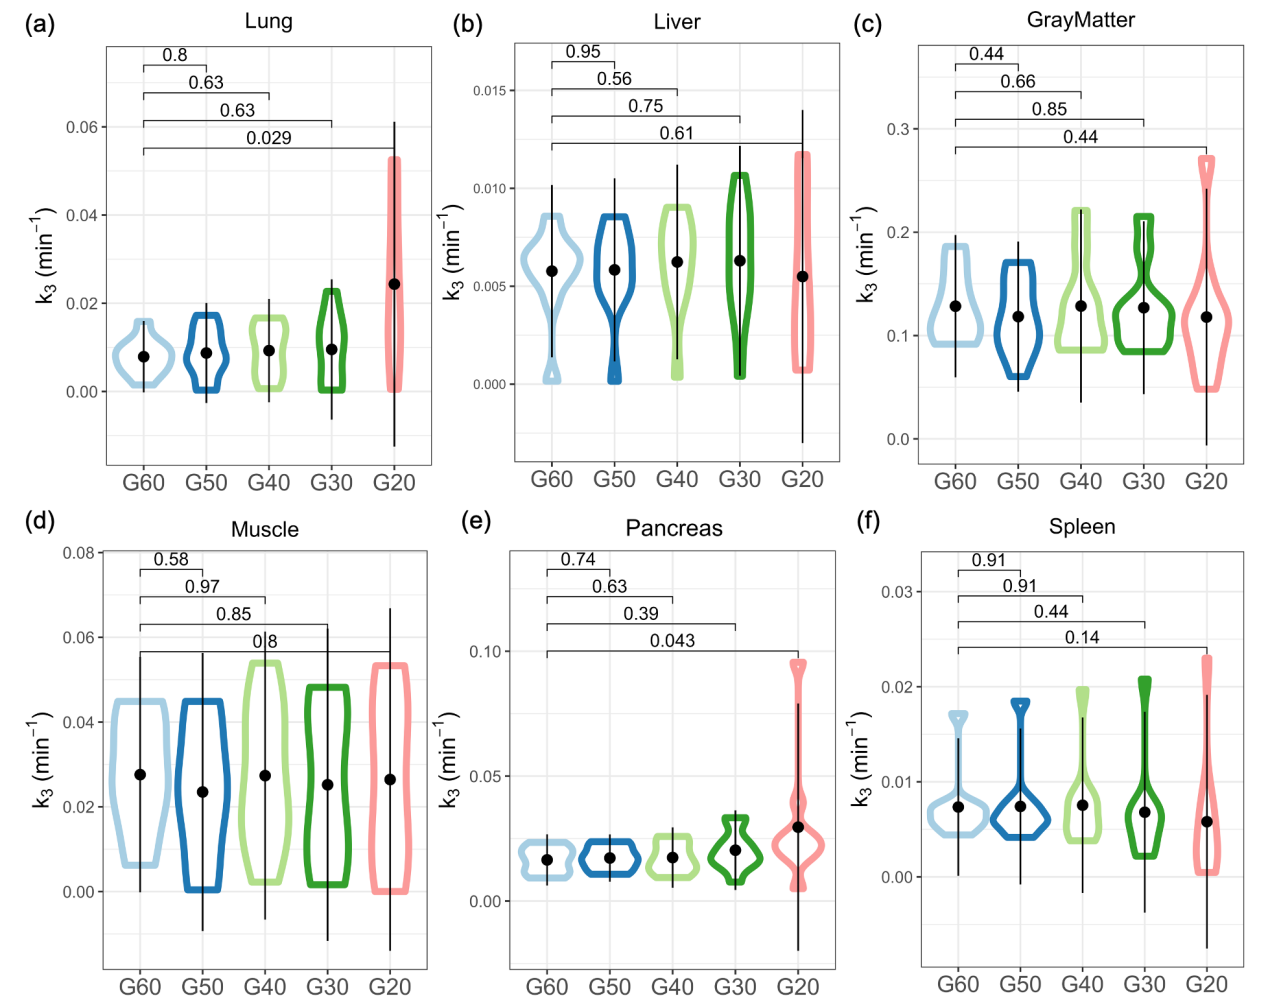


**Supplementary Fig. S4** The comparison of k3 for the organs/tissues from different acquisition time compared with the reference G60.


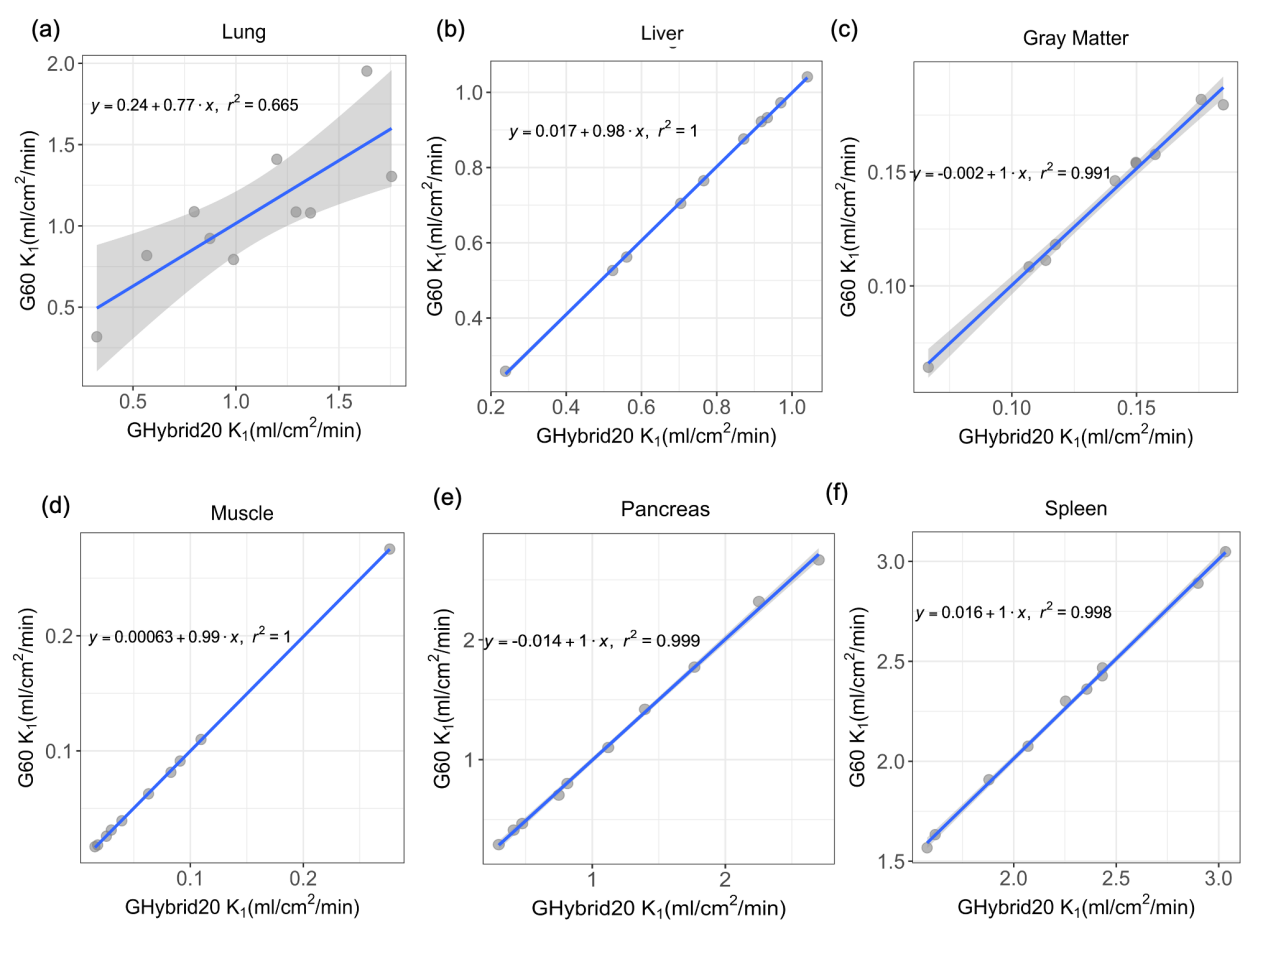


**Supplementary Fig. S5** The linear regression of K1 for different organs/tissues between G60 and GHybrid20.


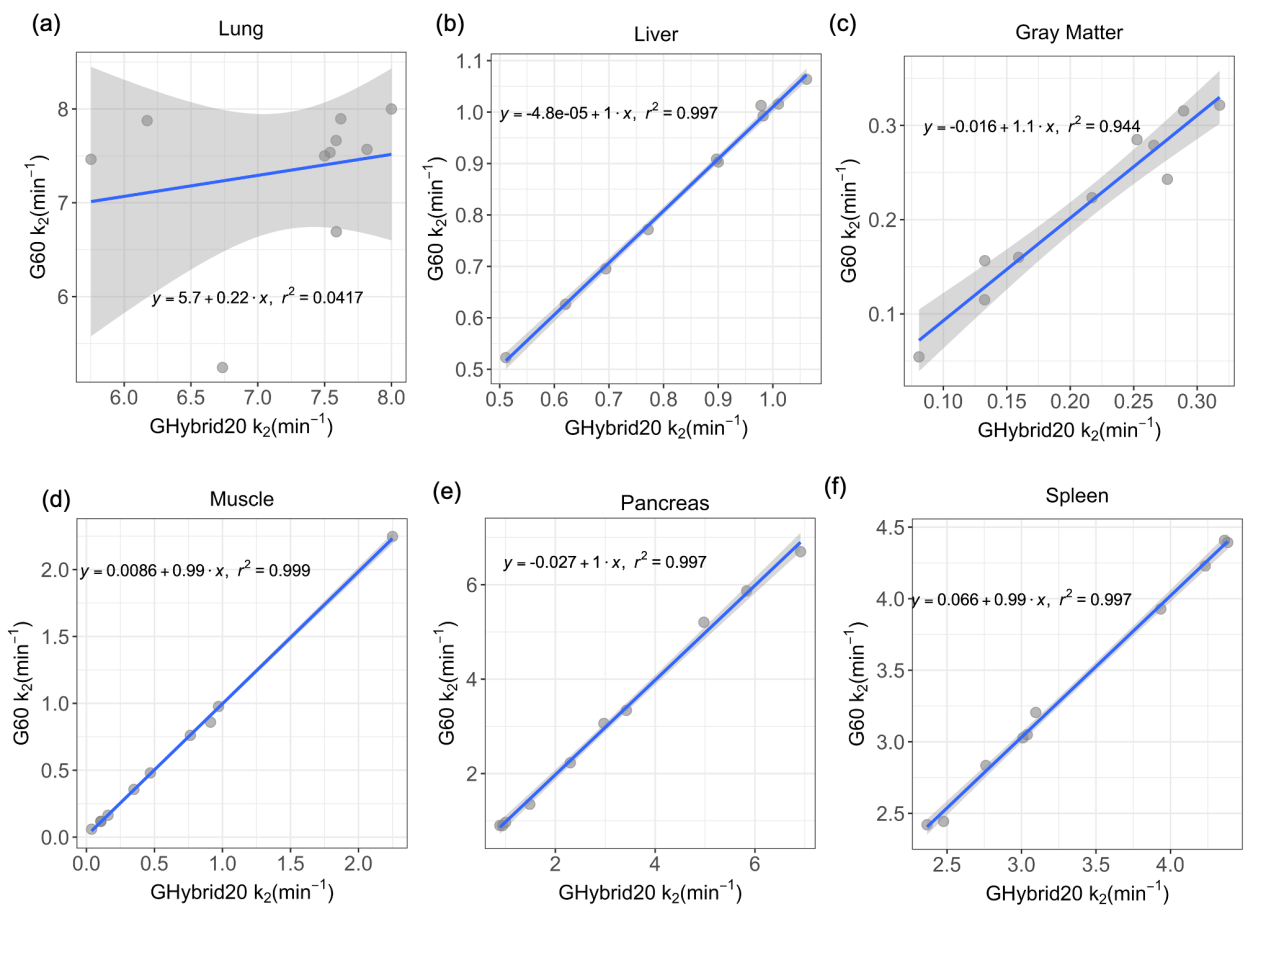


**Supplementary Fig. S6** The linear regression of k2 for different organs/tissues between G60 and GHybrid20.


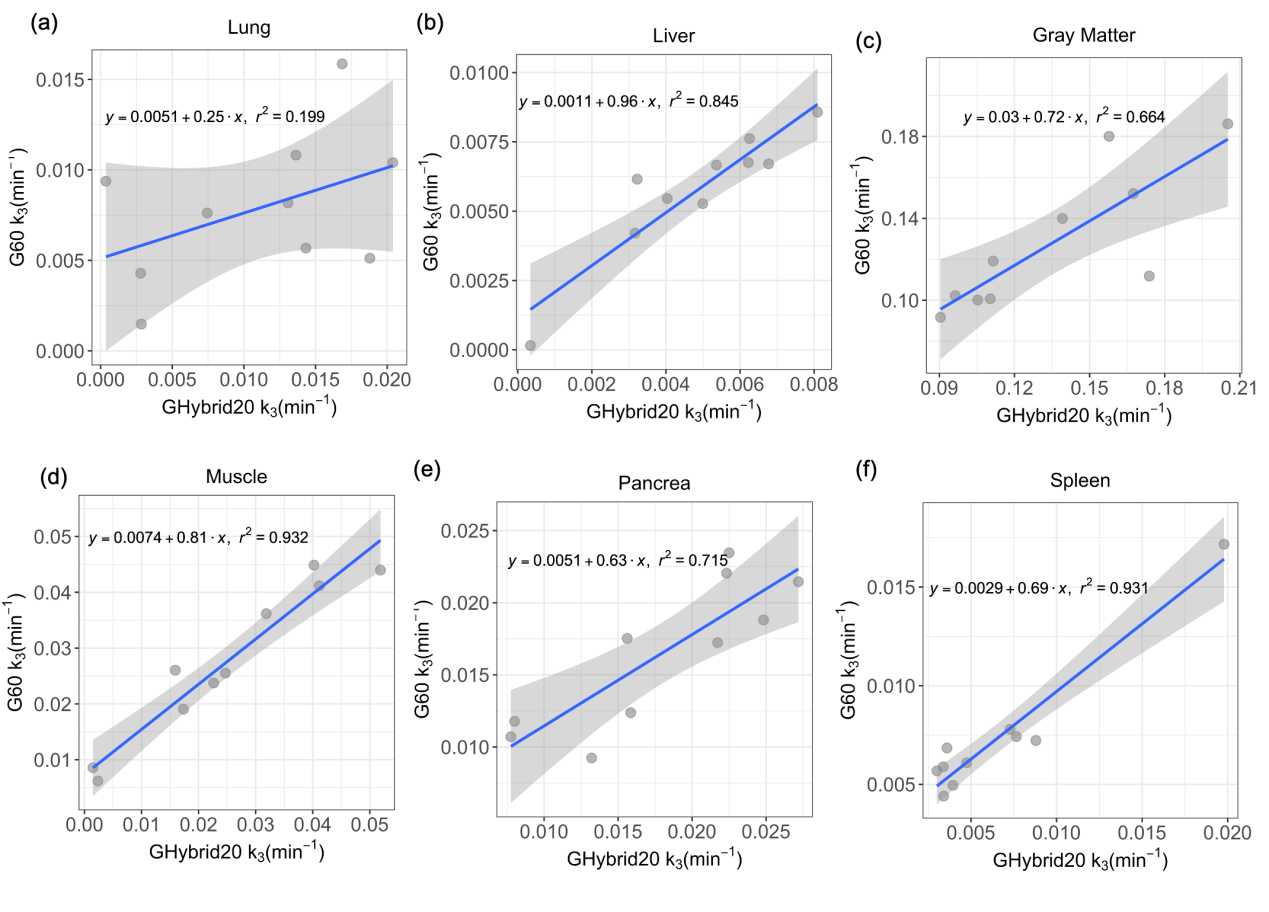


**Supplementary Fig. S7** The linear regression of k3 for different organs/tissues between G60 and GHybrid20.
